# Supplementary material
Source: publisher site journal article supplement (https://www.kjim.org/upload/media/kjim-2025-037-supplementary-fig-1.pdf)
Supplement: Supplementary file 1 [file kjim-2025-037-supplementary-fig-1.pdf]

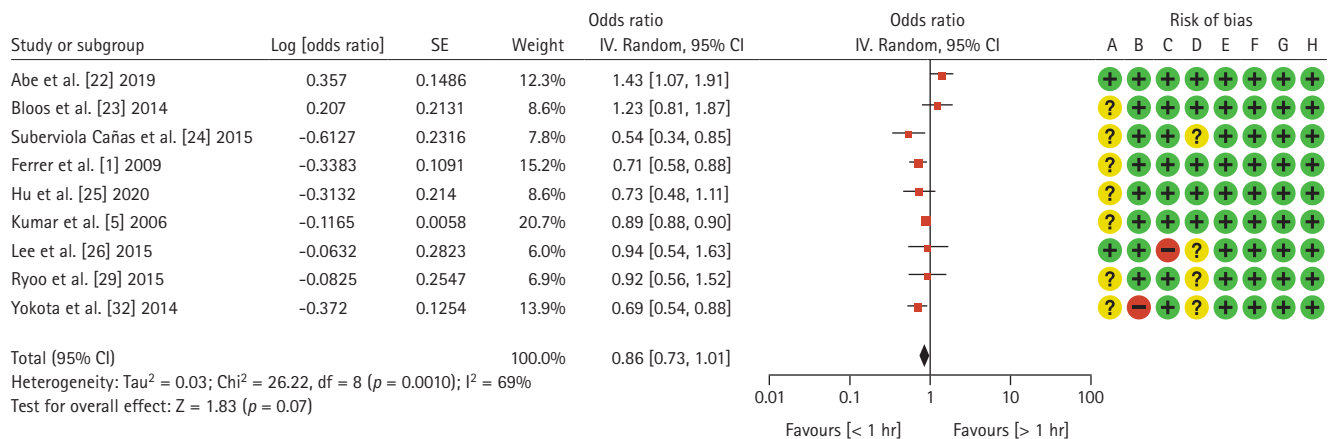

A

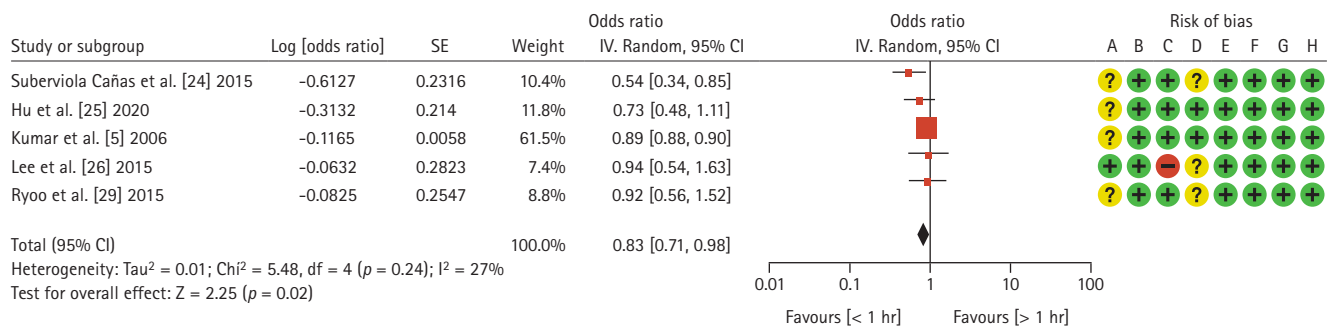

B

**Supplementary Figure 1.** Sensitivity analysis of pooled odds ratios for mortality by antibiotic administration time (within 1 hour vs. after 1 hour). A study with a heterogeneous mortality endpoint (90-day mortality) was excluded. Analysis conducted in patients with (A) overall sepsis and (B) septic shock. SE, standard error; IV, inverse variance; CI, confidence interval. Risk of bias legend: (A) Comparability of the target group; (B) Target group selection; (C) Confounders; (D) Measurement of intervention/exposure; (E) Blinding of assessors; (F) Outcome assessment; (G) Incomplete outcome data; (H) Selective outcome reporting.
